# Supplementary material for: Survival analyses correlate stanniocalcin 2 overexpression to poor prognosis of nasopharyngeal carcinomas
Source: PubMed Central journal article supplement (PMC4015363; doi:10.1186/1756-9966-33-26), 2014-03-08
Supplement: 1756-9966-33-26-S1.pdf [file 1756-9966-33-26-S1.pdf]

**Supplementary Table**  
**STC2 overexpression status in different treatment groups**

| Parameters   | Category | STC2               |                    | $\chi^2$ | P     |
|--------------|----------|--------------------|--------------------|----------|-------|
|              |          | Positive<br>(N=65) | Negative<br>(N=29) |          |       |
| Treatment    | RT alone | 14                 | 4                  | 0.777    | 0.378 |
|              | CRT      | 51                 | 25                 |          |       |
| Radiotherapy | IMRT     | 31                 | 23                 | 8.201    | 0.004 |
|              | 2D-RT    | 34                 | 6                  |          |       |
| Residual     | Yes      | 25                 | 7                  | 1.832    | 0.176 |
|              | No       | 40                 | 22                 |          |       |

RT: radiation therapy; CRT: chemoradiation Therapy; IMRT: intensity-modulated radiation therapy; 2D-RT: Two - dimensional radiation therapy; Residual: Presence of residual
